1 **Climate-fire-vegetation interactions and the rise of novel landscape patterns in subalpine**  
2 **ecosystems, Colorado**

3

4 W. John Calder<sup>a,b,\*</sup>, Ivanka Stefanova<sup>c</sup>, and Bryan Shuman<sup>a,b</sup>

5 <sup>a</sup>Program in Ecology, University of Wyoming, Laramie WY, 82071

6 <sup>b</sup>Department of Geology and Geophysics, University of Wyoming, Laramie, WY, 82071

7 <sup>c</sup>Department of Geography, University of Minnesota, Minneapolis, Minnesota 55455

8 \*corresponding author: wcalder@uwyo.edu

9

10 **Running head:** climate-wildfire-vegetation interactions

11 **Summary:**

- 12 1. Feedbacks at multiple scales can be important for shaping how forest ecosystems respond  
13 to both climate change and disturbance. At landscape scales, feedbacks likely exist  
14 between vegetation and wildfire regimes such that a change in one produces changes in  
15 the other. More locally, some forest patterns can result from feedbacks between plants  
16 and their abiotic environment. Alternating areas of forest and meadow (ribbon forests) in  
17 subalpine forest provide an example where both scales of feedbacks could be important  
18 with changes in climate-vegetation-fire interactions giving rise to local-scale feedbacks  
19 between snow drifting and forest extent that created the ribbon forests and further  
20 feedback to alter fuel continuity and fires regimes.
- 21 2. To examine the feedbacks in subalpine forests and the history of ribbon forests, we  
22 obtained six fossil pollen records from lakes across a subalpine landscape in Colorado.  
23 Forests there may have responded to climate change and widespread wildfires ca. 1000  
24 years ago when >80% of sites on the landscape burned within a century. The fires  
25 coincided with regional warming, but the extent of burning declined before the climate  
26 cooled, possibly driven by changes in fuel structure and composition.
- 27 3. Results of cluster analyses of the pollen percentages indicate that large changes between  
28 successive sets of samples coincided with the widespread wildfires at five of the six sites.  
29 After the wildfires, sagebrush (*Artemisia*) and other meadow taxa increased as conifers,  
30 especially spruce (*Picea*), declined across the landscape, indicating that the forests  
31 opened.
- 32 4. *Synthesis.* The opening of the forests may have created fuel breaks across the mountain  
33 range that limited wildfire after temperatures rose ~0.5 °C. When the openings then

34 became larger and the area covered by ribbon forest expanded during the Little Ice Age  
35 (LIA), the extent of fires further declined. Pollen assemblages associated with modern  
36 ribbon forests only became common across our study sites during the LIA when the  
37 frequency of fires across our sites reached its minimum. The rise of novel ribbon forests  
38 in northern Colorado thus illustrates how climate and fire can interact to rapidly  
39 transform landscapes and their disturbance regimes.

40

41 **Key-words:** palaeoecology, abrupt shifts, climate change, disturbance, novel ecosystems,  
42 wildfire, subalpine forests

### 43 **Introduction**

44 Recent increases in the area burned per year by wildfire and other forest declines around  
45 the world challenge ecologists to consider how disturbances may permanently alter vegetation  
46 patterns and composition (Allen et al., 2010; Turner, Gardner, & O'Neill, 2015). Disturbances  
47 may catalyze large-scale ecological responses to climate change, which could include novel  
48 ecological communities and patterns (Jackson, Betancourt, Booth, & Gray, 2009; Millar &  
49 Stephenson, 2015; Turner, 2010). By creating persistent stress, climate change can alter the  
50 potential responses to disturbance, and thus enable disturbance events to trigger critical  
51 transitions to new ecosystem states (Scheffer, Carpenter, et al., 2012). Such changes may  
52 feedback to further alter the disturbance regimes, and thus permanently alter ecosystem function  
53 as well as structure and composition, and paleoecology can provide retrospective insights on  
54 such dynamics (e.g., Clifford and Booth 2015).

55 Here, we consider how climate, wildfire, and vegetation interacted in a subalpine  
56 ecosystem over the past two millennia. The setting is ideal for examining of how climate changes

57 and disturbances interact with each other and with vegetation patterns for several reasons. First,  
58 subalpine forests support stand-replacing fires, which leave a sedimentary record because of the  
59 accumulation of charcoal in lakes. The fires, in turn, influence the composition and structure of  
60 the forests, which is recorded by fossil pollen. Second, high-elevation forests grow at their  
61 climatic limits and are, thus, sensitive to changes in climate over time. Finally, climate can  
62 determine the frequency of wildfires, which often burn most extensively during warm, dry years.  
63 Subalpine ecosystems, thus, exemplify the triangular relationship among climate, fire regimes,  
64 and vegetation (Fig. 1; Whitlock et al. 2010).

65 We ask whether the interactions among climate, fire, and vegetation can produce  
66 landscape-scale state shifts by examining fossil pollen records across a mountainous landscape  
67 where both climate and fire regimes changed substantially in recent millennia (Fig. 2). Our  
68 previous work in this ecosystem showed that the area burned per century was sensitive to  
69 temperature changes with more than 80% of our study landscape burning when mean annual  
70 temperatures rose  $\sim 0.5$  °C during Medieval times about 1000 years ago (Calder, Parker, Stopka,  
71 Jiménez-Moreno, & Shuman, 2015). However, the high rates of burning did not persist as long  
72 as the region remained warm, suggesting ecological limits to sustained, large wildfires. We  
73 hypothesized that warming facilitated larger fires, but that the fires drove changes in vegetation  
74 structure that limited the spread of additional fires (Calder et al., 2015). Consistent with this  
75 hypothesis, we also found that the fires at one of our study sites accelerated the local  
76 development of “ribbon forests”, a discontinuous mix of linear alpine meadows and ribbons of  
77 conifer forest (Fig. 3; Calder & Shuman, 2017). Fossil pollen indicates that ribbon forests only  
78 developed there after the fires, but were maintained throughout the last millennium by climatic

79 cooling, which culminated in the Little Ice Age (LIA), a period of cool conditions beginning  
80 about AD 1300 or 650 BP (years before AD 1950)(Calder & Shuman, 2017).

81 Using additional records, this paper further evaluates two paired hypotheses about the  
82 interactions of climate, fire, and vegetation in subalpine ecosystems. We hypothesize that large  
83 fires can 1) trigger persistent legacies in the pattern of vegetation across a landscape when  
84 climate trends prevent a return to pre-fire states, and 2) produce vegetation changes that feed  
85 back to alter fire regimes. Potentially, such interactions can give rise to novel vegetation patterns,  
86 which may be the case here if ribbon forests had not previously existed within this landscape.

87 To examine these hypotheses, we reconstructed the vegetation history of the landscape  
88 that includes the Mount Zirkel Wilderness of northern Colorado (Fig. 2). We generated five new  
89 fossil pollen records from across a range of elevations (Table 1). Including our previous study  
90 site (Calder & Shuman, 2017), the network of records includes six lakes with two lakes within  
91 discontinuous ribbon forests, two lakes within mid-elevation conifer forests adjacent to areas of  
92 ribbon forest, and two other lakes within low elevation conifer-aspen forests. All of these  
93 locations show evidence of the large fires at ca. 1100 years before AD 1950 (BP) (Calder et al.,  
94 2015), and can thus provide constraints on the extent and persistence of rapid post-fire vegetation  
95 changes.

96

## 97 **Study Sites**

98 Our study area spans across the Park Range, which forms the northern most range along  
99 the Continental Divide in Colorado and is located primarily within the Mount Zirkel Wilderness  
100 area of the Routt National Forest. Each of the lakes cored are similar in size, between 1.9 and 3.8  
101 ha, and similar in depth, between 5 and 10 m deep (Table 1). Elevations within the study area

102 range from 2000 – 3700 m with greater topographic relief and variability in the northern than  
103 southern half of the range (Fig. 2). Crystalline bedrock, including quartz monzonite, felsic  
104 gneiss, and mica schist dominates the geology (Snyder 1980a,b), and the range was also heavily  
105 glaciated (Atwood, 1937).

106         Across the lowest elevations, between approximately 2000 and 2800 m, mixed *Pinus*  
107 *contorta* (lodgepole pine) and *Populus tremuloides* (aspen) forests dominate the forest vegetation  
108 with some *Picea engelmannii* (Engelmann spruce) and *Abies lasiocarpa* (subalpine fir),  
109 particularly on north-facing slopes and along drainages. On the west side of the divide, these  
110 mixed forests adjoin a zone of *Quercus gambelii* (Gambel’s oak) with some stands of oak  
111 intermixing within the mosaic of mixed forest on south-facing aspects. Above approximately  
112 2800 m, the vegetation is dominated by spruce-fir forests. At the highest portions of the  
113 mountain range, approximately >3100 m, the spruce-fir forests transition to ribbon forests and  
114 open meadows with patches of spruce-fir forests. The ribbon forests are composed of alternating  
115 bands of spruce-fir forests approximately 10 – 20 m wide and separated by 30 – 70 m wide  
116 meadows (Fig. 3; Billings 1969). Snowdrifts tend to persist late into the summer in these  
117 meadows and may play a role in the pattern and formation of the ribbon forests (Hiemstra,  
118 Liston, & Reiners, 2002; Moir, Rochelle, & Schoettle, 1999). The open meadows between the  
119 ribbons of spruce-fir forests are dominated by grasses, such as *Danthonia intermedia* and  
120 *Deschampsia cespitosa*, *Artemisia scopulorum* (sagebrush), and flowering plants in the  
121 *Asteraceae* family.

122         The two high elevation lake sites, Seven Lakes and Summit Lake, lie near the Continental  
123 Divide and ribbon forests currently surround both the lakes (Table 1; Calder et al. 2014). Summit  
124 Lake lies along a broad plateau with large areas of ribbon forests (Calder et al., 2014). By

125 contrast, Seven Lakes lies along a narrow ridge where ribbon forests grow but cover only a small  
126 fraction of the source area for the pollen deposited on the lake, assuming a pollen source area of  
127 ~6 km radius (Schwartz, 1989).

128 Ribbon forests also lie within the pollen source areas of two other mid elevation sites,  
129 Gold Creek and Gem lakes. (Table 1). The primary vegetation surrounding Gem Lake is closed  
130 spruce-fir forests, but ribbon forests and open meadows lie 200 m upslope, within 300 m  
131 laterally, of the lake. Similarly, closed spruce-fir forests form the primary vegetation surrounding  
132 the north-facing slopes around Gold Creek Lake, which sits on the south side of a glacially-  
133 carved canyon. Ribbon forests and a mix of open meadows cover much of the nearby landscape  
134 within 1 km where elevations rise 300 m above the lake. At these high elevation lakes (Gem,  
135 Gold Creek, Summit and Seven Lakes), lodgepole pine and other pine species are rare in the  
136 areas surrounding the lakes, which indicates that any *Pinus* pollen found at these spruce-fir sites  
137 likely comes from long-distance transport.

138 Finally, mosaics of spruce-fir, lodgepole pine, and aspen forests surround the two lowest  
139 elevation sites, Hidden and Hinman lakes. West of the continental divide, open sagebrush parks  
140 and dense Gamble's oak thickets, combined with spruce-fir, lodgepole, and aspen forests, grow  
141 at the low-elevation forest ecotone near Hinman Lake (Table 1). On the east of the divide,  
142 Hidden Lake is surrounded primarily by lodgepole pine and spruce-fir forests, with aspen groves  
143 further upslope.

144

## 145 **Methods**

146 The work presented here builds on previous analyses of sediment cores collected from  
147 the six lakes. Calibrated radiocarbon chronologies and sedimentary charcoal stratigraphies used

148 here are the same as previously published (Calder et al., 2015). Wildfire events, indicated by  
149 peaks in the rate of charcoal accumulation within each core, were calculated using standard  
150 techniques and form the basis for a reconstruction of the percentage of sites burned per century  
151 across the landscape (Calder et al., 2015). To generate the wildfire reconstructions, charcoal  
152 counts from contiguous 1 cm intervals (1-2 cm<sup>3</sup> of sediment) were decomposed to identify fire  
153 episodes (Higuera, Brubaker, Anderson, Hu, & Brown, 2009). The age uncertainty distributions  
154 of the individual fire episodes were calculated using Bchron that models sediment accumulation  
155 rates using a Monte Carlo Markov Chain simulation in R (Haslett & Parnell, 2008; Parnell,  
156 Haslett, Allen, Buck, & Huntley, 2008; R Development Core Team, 2014). By combining the  
157 age uncertainty distributions for all fire episodes across all sites, including six additional charcoal  
158 records not used here for pollen analyses, we estimated the potential range of study sites burned  
159 per century for the last 2000 years (Calder et al., 2015).

160

### 161 *Pollen preparation and analyses*

162 To detect the effects of the past fires on vegetation, we added fossil pollen analyses to  
163 five of the six sediment cores. A separate paper describes the detailed pollen record from the  
164 sixth core collected from Summit Lake (Calder & Shuman, 2017). In all cases, pollen was  
165 processed with standard techniques of acid digestion (Faegri, Kaland, & Kzywinski, 1989), and a  
166 minimum of 300 terrestrial grains per sample were counted. Pollen percentages were calculated  
167 from the sum of terrestrial taxa, excluding aquatic and wetland taxa, such as *Cyperaceae*. *Pinus*  
168 percentages were the combined counts from Diploxylon and Haploxylon types. Two researchers  
169 counted the pollen (Calder and Stefanova), and we tested for and corrected researcher-specific  
170 biases in the counts.



171           In addition to evaluating changes in the percentages of pollen from individual taxa, we  
172 considered changes in the ratio of pollen from the dominant trees (conifers) versus the taxa  
173 representative of open meadows. The ratio of conifer pollen (*Pinus*, *Picea*, and *Abies*) to the  
174 dominant subalpine non-arboreal taxa (*Artemisia*, *Poaceae*, and *Asteraceae*) was calculated  
175 using the terrestrial percentages. For simplicity, we refer to these groups as the conifers and  
176 herbs and shrubs, and refer to the ratio between them as the conifer:herb pollen ratio (C:H) to  
177 avoid confusion with the conventional arboreal:non-arboreal pollen ratio used in many  
178 palynological studies. Low-elevation taxa found primarily in the surrounding intermountain  
179 basins (e.g., *Sarcobatus*) were excluded. Lynch (1996) found that the ratio of C:H can  
180 discriminate between pollen assemblages from closed subalpine forests and high elevation  
181 treeless parks.

182           At the landscape scale, which we define as the scale represented by all six study sites  
183 together, we calculated the median C:H from all of the mid- and high-elevation sites (Gem Lake,  
184 Gold Creek Lake, Seven Lakes, and Summit Lake). One challenge making comparisons between  
185 pollen records arises from the age uncertainty associated with the individual sediment samples  
186 from each lake. To account for the age uncertainty between lakes, we linearly interpolated each  
187 pollen record 2250 times to 65-year time steps (the median pollen sampling resolution across  
188 sites) using 2250 different age-depth relationships generated in Bchron (Haslett & Parnell, 2008;  
189 Parnell et al., 2008). We then calculated the mean time series of the ratios for all lakes, where  
190 each 65-year time step had a C:H ratio averaged across all four sites from each 2250 different  
191 interpolation possibilities. We then use the median of the ensemble of four lake means, as well as  
192 95<sup>th</sup> and 5<sup>th</sup> percentiles of the distribution, for our analysis. For the mean C:H from each lake

193 record, we evaluated the probabilities of a change point at every time step using Bayesian change  
194 point analysis with the *bcp* R package (Erdman & Emerson, 2007)

195         Constrained cluster analysis (Grimm, 1987) was also used to evaluate changes in pollen  
196 assemblages within each pollen records using taxa with > 2% representation and clusters  
197 constrained to include only temporally adjacent sets of samples using the R package *rioja*  
198 (Juggins, 2015). The chi-square dissimilarity metric was used to create the dissimilarity matrix  
199 for each cluster analysis with the *analogue* R package (Simpson, 2007) because previous  
200 analyses showed the chi-square dissimilarity metric offered the best separation of dissimilarity  
201 among forests types across our study area (Calder & Shuman, 2017). We compare the timing of  
202 the large fires within the study area to the timing of breaks between clusters with the expectation  
203 that, if fires altered the composition of the vegetation, the timing of fires and cluster breaks  
204 should be correlated.

205         Unconstrained cluster analysis (not constrained by stratigraphic position) was calculated  
206 with the fossil samples from all six pollen records in the same matrix without age information.  
207 To do so, we used the chi-square dissimilarity and the same taxa list as the constrained cluster  
208 analysis. Previous work using a network of pollen surface samples from the area showed that  
209 pollen samples from the vegetation types of open forests near treeline and closed forests below  
210 treeline were distinguishable from ribbon forests (Calder & Shuman, 2017). Therefore, we used  
211 the first three clusters from the unconstrained cluster analysis to determine the distribution of the  
212 major vegetation types through time across the network of sites.

213

## 214 **Results**

### 215 *Pollen Percentages*

216 Elevation differences between the pollen source areas of each lake appear to affect the  
217 pollen assemblages (Figs 4 – 6). Summit Lake (Fig. 4b), which is functionally the highest site as  
218 the broad plateau allows for the greatest amount of ribbon forests, contains high *Picea* (>20%)  
219 and *Artemisia* (>40%) and low *Pinus* (<40%) pollen percentages. The records from the sites near  
220 large areas of mid-elevation forests (Seven, Gem, and Gold Creek lakes) contain intermediate  
221 percentages of *Pinus*, *Picea*, and *Artemisia* pollen. The pollen percentages from Seven, Gem and  
222 Gold Creek lakes fall between the high *Picea* and *Artemisia* and low *Pinus* percentages at  
223 Summit Lake and the low *Picea* (<10%) and *Artemisia* (<20%) and high *Pinus* (>50%) pollen  
224 percentages of the low-elevation lakes, Hidden and Hinman lakes (Figs 4 – 6). Hidden and  
225 Hinman lakes also contain the highest percentages (~5%) of *Quercus* pollen (Fig. 6).

226 In most of the pollen records, however, changes in *Pinus*, *Picea*, and *Artemisia* pollen  
227 percentages define the important differences with time, with the minor taxa (*Sarcobatus*,  
228 *Ambrosia*, and *Amaranthaceae*) differing little through time (Figs 4 – 6). *Pinus* pollen  
229 percentages declined towards the top of each core at all sites, except for Hidden Lake, and  
230 *Artemisia* pollen percentages increased as *Pinus* declined. At Hidden Lake, *Pinus* and *Artemisia*  
231 percentages varied through time, but with no consistent trend (Fig. 6a). Several of the sites,  
232 particularly Seven and Gold Creek lakes, also contain peaks in *Quercus* pollen percentages at ca.  
233 1000 BP and again in the last 300 years (Figs 4a and 5b).

234 At Summit Lake, *Picea* pollen percentages declined from >25% to <10% in the last 1000  
235 years, especially after a sharp rise in *Artemisia* pollen percentages to >30% at 987 BP associated  
236 with the local expression of the large fires (plus symbols within the red bar, Fig. 4b). The

237 maximum *Pinus* pollen percentages were reached just prior to this transition. The decline in  
238 *Pinus* at 1021– 987 BP coincides with a step shift in C:H from  $>2$  to  $<1$  (Fig. 4b) and a 0.77  
239 probability of a change point at 1035 BP in the interpolated C:H.

240 At Seven Lakes, important changes also include a sharp decline in *Picea* pollen  
241 percentages to  $<10\%$  from  $>15\%$  by 1132 BP when two charcoal peaks represent the local  
242 expression of the extensive fires (plus symbols within the red bar, Fig. 4a). As at Summit Lake, a  
243 brief peak in *Pinus* pollen percentages, which reached  $>50\%$ , preceded the decline at Seven  
244 Lakes (Fig. 4). The changes produced a shift in the mean C:H from 1.5 to 1 that distinguishes the  
245 periods before and after ca. 1000 BP and a 0.98 change point probability beginning at 1235 BP  
246 in the interpolated C:H.

247 Changes at Gem Lake include a decline in *Pinus* pollen percentages from  $>40\%$  to  $\sim 30\%$   
248 at ca. 1000 BP in association with the charcoal peaks representative of the large fires (plus  
249 symbols within the red bar, Fig. 5a). Like the highest elevation sites, Summit Lake and Seven  
250 Lakes, *Pinus* pollen percentages at Gem Lake reached their maximum just before that decline.  
251 *Artemisia* rose subsequently and obtained its local maximum after 780 BP.

252 At Gold Creek Lake, *Pinus* and *Picea* pollen percentages declined sharply at 1101 BP in  
253 association with the local expression of the widespread fires, and when *Artemisia* pollen  
254 percentages increased stepwise by  $>10\%$  (Fig. 5b). The C:H ratio also declined to  $<2$  after 1101  
255 BP and remained below 2 for the rest of the record. At 1165 the interpolated C:H declines with a  
256 0.65 probability of change point. *Artemisia* pollen percentages did not reach their local  
257 maximum ( $>30\%$ ), however, until after another sharp  $>10\%$  increase after 500 BP. An early  
258 phase of high *Pinus* pollen percentages, like those observed at Hidden and Hinman lakes

259 (>50%), dates to 2000 – 1800 BP at Gold Creek, but another short-lived maximum preceded the  
260 fires at 1188 BP.

261 The pollen record from Hidden Lake contains more variability in C:H ratios than the  
262 other lakes with a sharp decline at ca. 1500 BP and a sharp increase at ca. 500 BP (Fig. 6a). The  
263 changes represent a tradeoff between high *Pinus* and *Artemisia* pollen percentages, which  
264 culminated in a *Pinus* minimum and *Artemisia* maximum associated with peaks in Poaceae and  
265 herbaceous taxa at ca. 600 BP after the only fire episode detected from 1000 – 100 BP. The  
266 interval at ca. 600 BP includes the highest rates of charcoal accumulation in the core (Calder et  
267 al., 2015).

268 Finally, Hinman Lake experienced many changes like those observed at higher  
269 elevations, including maximum *Pinus* pollen percentages at 1136 BP before the local expression  
270 of the large-scale fires and a sharp rise in *Artemisia* pollen percentages to >20% (Fig. 6b). *Pinus*  
271 pollen percentages declined at the same time, ultimately reaching a minimum from ca. 300 – 100  
272 BP when both *Abies* and Asteraceae pollen percentages also reached maxima. The C:H ratio  
273 likewise fell from >4 from ca.1500 to 1136 BP to <2 in most samples from ca. 600 – 100 BP.  
274 The decline in the interpolated C:H at 1100 BP has a 1.00 probability of a change point.

275

## 276 *Pollen Zones*

277 Because of the varied local changes, a break in high order clusters of pollen samples was  
278 located between ca.1200 and 1000 BP at all sites except for Gem Lake. The boundaries between  
279 stratigraphic clusters (pollen zones), therefore, overlap in time with the most widespread fires  
280 (red bars, Figs 4 – 7). At Summit Lake, the largest separation of clusters falls between pollen  
281 samples with median ages of 1021 and 987 BP (Fig. 4b). At Seven Lakes, the second largest

282 cluster break dates between 1275 and 1132 BP but given the age uncertainties and spacing of  
283 pollen samples, the break is not significantly different in time from the break at Summit Lake or  
284 the most widespread fires (red bar, Fig. 4). At Gold Creek Lake, a third order break falls between  
285 1188 – 1101 BP, and at Hidden Lake between 1005 – 956 BP (Figs 5b and 6a). A high order  
286 separation between clusters also dates to 1136 – 1081 BP at Hinman Lake, although the first-  
287 order break dates to ca. 300 BP (Fig. 6b). At Gem Lake, however, the largest separation between  
288 clusters dates to 780 – 705 BP (Fig. 5a), which is consistent with other high order cluster breaks  
289 at sites such as Gold Creek and Hinman that could be associated with forest changes associated  
290 with the LIA.

291         The median C:H ratios from the mid- and high-elevation sites (Seven, Summit, Gem, and  
292 Gold Creek lakes) summarizes the differences between the clusters of pollen samples before and  
293 after 1021 (1275 – 956) BP (Fig. 7). Before the breaks in the constrained cluster analysis (Figs 4  
294 – 6), and the peak in the area burned, which dates to 1130 – 1030 BP (Fig. 7a; Calder et al.,  
295 2015), the median C:H ratio varied between 2.49 and 1.97. However, from 1165 – 970 BP, the  
296 median ratio declined from 2.11 to 1.67, which was the largest single period of decline since  
297 2000 BP (Fig. 7c). Afterwards, the ratio continued to decline and varied between 1.67 and 1.36  
298 from 970 to 60 BP, in parallel with regional cooling (Fig. 7).

299

### 300 *Unconstrained cluster analysis*

301         A cluster analysis of all the pollen samples, which was not constrained by their temporal  
302 position, indicates that the samples fall into three major groups (Fig. 8). The top cluster contains  
303 the modern sample from Summit Lake, which is the most representative of ribbon forests of any  
304 of the sites. At Summit Lake, most samples after the fires ca. 1000 years ago fall into this first,

305 ribbon forest cluster (Fig 8). The top cluster later became important at Gem and Gold Creek  
306 lakes, although the modern samples from each of these sites, as well as early samples from  
307 Summit Lake, are grouped within the middle cluster. The middle cluster, therefore, appears to  
308 represent closed spruce-fir forests and was most important in the early part of all the records  
309 except at Hidden and Hinman lakes. The third cluster includes the low-elevation samples from  
310 Hidden and Hinman lakes, and therefore, represents mixed forests of lodgepole, aspen, spruce,  
311 and fir.

312         The opening of the forests at most sites began sharply at the time of the fires at each site  
313 (Figs 4 – 7), but the cluster analysis indicates that only the vegetation changes at Summit Lake  
314 exceeded the differences between elevational zones today at that time (Fig. 8). The continued  
315 trend toward increased *Artemisia* and reduced conifer pollen percentages (e.g., Fig. 7c) was  
316 required before Gem and Gold Creek lakes shifted from one cluster to another during the LIA  
317 (Fig. 8). Thus, the ribbon forest cluster became widespread by ca. 500 BP, even though it had  
318 been rare prior to 1000 BP. Indeed, the Seven Lakes record extends to >4000 BP and Summit  
319 Lake extends to >2800 BP, but neither lake contains samples that cluster with the ribbon forests  
320 around Summit Lake today before ca. 2000 BP. Even then, the ribbon forest cluster only  
321 registers intermittently at Summit Lake from 2000 – 1000 BP, when regional isotopic datasets  
322 indicate another earlier cool or snowy interval (Anderson, 2011; Anderson, Berkelhammer, &  
323 Mast, 2015), and it only becomes important across the landscape after 1000 – 500 BP (Fig. 5).  
324 The pollen source area of Seven Lakes never became dominated by ribbon forest, but during the  
325 LIA, ribbon forests became most extensive across the Park Range based on their expansion near  
326 Gem and Gold Creek lakes (Fig. 5).

327

## 328 **Discussion**

### 329 *Vegetation changes*

330         The pollen data support our first hypothesis that large fires can trigger vegetation changes  
331 with legacies that persist across the landscape. Climate trends, such as cooling that culminated in  
332 the LIA after ca. 650 BP (Fig. 7a), played a first-order role in shaping forest composition (Calder  
333 and Shuman, 2017) and determined the time when the modern patterns of forest types developed.  
334 Ribbon forests, for example, became most extensive during the LIA (Fig. 8). At nearly all the  
335 study sites, however, pollen assemblages changed after the most widespread wildfires of the last  
336 2000 years. Five of the six pollen records show high order clustering before and after the peak in  
337 the area burned by wildfires (Figs 4 – 6). The median ratio of C:H pollen indicates that extensive  
338 Medieval wildfires (Fig. 7b) accelerated a decline in tree cover (Fig. 7c) even though warming at  
339 the time (Fig. 7a) may have initially favored an expansion of forest cover (Fig. 7c), often  
340 represented by pre-fire maxima in *Pinus* pollen percentages (*Pinus* peaks below red lines in Fig.  
341 4-5). After the fires, the relative abundance of open meadow taxa rapidly increased and remained  
342 high for the last 1000 years (Figs 4 – 7).

343         The vegetation changes ca. 1000 years ago also produced pollen assemblages without  
344 many earlier analogs. The cluster of pollen samples that today includes samples from the modern  
345 ribbon forest at Summit Lake only became important across the landscape in the last millennium  
346 (Fig. 8), indicating that the vegetation patterns first began to develop a modern configuration in  
347 the last 2000 years after the extensive fires ca. 1000 BP and then the cooling that marked the LIA  
348 after ca. 650 BP. Forest openings were not limited to these high elevation areas, however,  
349 because large changes were also observed near the low-elevation ecotone at Hinman Lake (Fig.  
350 6b) and because the high-elevation ribbon forests represent only a small portion of the pollen



351 source area of the six lakes. At Hinman Lake, forest opening may represent the expansion of  
352 meadows in areas of cold air drainage, which would also be consistent with an increase in *Abies*  
353 pollen percentages there by ca. 700 BP (Fig. 6b).

354 The apparent vegetation legacies of the fires persisted far longer than expected if only  
355 ecological factors, such as limitations on seed dispersal, had impacted forest recovery. The  
356 persistence of the changes may, instead, reflect the effects of regional climate changes after the  
357 wildfires, including severe Medieval droughts (Cook, Woodhouse, Eakin, Meko, & Stahle, 2004;  
358 Woodhouse, Meko, MacDonald, Stahle, & Cook, 2010) and later regional cooling or increased  
359 snow precipitation (Anderson et al., 2015; Mann et al., 2009; Trouet et al., 2013). Both drought  
360 and later cooling could have reduced post-fire recruitment (Harvey, Donato, & Turner, 2016;  
361 Peet, 1981) and prevented post-fire recovery to the previous forest state across the mountain  
362 range. As a result, the synchronized wildfires catalyzed ecological changes across the landscape,  
363 which were then sustained by long-term climate shifts favorable to open forests (Calder &  
364 Shuman, 2017; Turner, 2010). Ultimately, cooling associated with the LIA (Fig. 7a) was  
365 probably important because it could have limited germination and recruitment at high elevation  
366 and in areas of cold air drainage, such as the sagebrush park below Hinman Lake (Coop &  
367 Givnish, 2008), and ribbon forests may have been most extensive at that time (Fig. 8).

368

#### 369 *Pre-fire conditions*

370 Before the widespread wildfires, increases in forest cover may have created optimal  
371 conditions for the spread of large fires. As temperature began to increase at the beginning of the  
372 Medieval period (MCA in Fig. 7a), the percentages of *Pinus* or *Picea* pollen increased to a peak  
373 at 5 of the 6 sites. At Summit, Gem, Gold Creek, and Hinman lakes, *Pinus* pollen reached

374 maxima of 38-71% at 1188 – 1136 BP. At Seven Lakes, both *Picea* and *Pinus* pollen percentages  
375 rose to near their maximum of the last 2400 years (16% and 54%, respectively). The combined  
376 records indicate that the pre-fire maximum of the median C:H ratio represents a meaningful  
377 phase of the landscape history (Fig. 7c), which could be consistent with increased forest density  
378 during the initial phases of regional warming (Fig. 7a). Regional warmth may also be indicated  
379 by peaks in the long-distance transport of *Quercus* pollen at the same time (Figs 4 and 5).

380         With the regional warming, conifers may have invaded high elevation meadows and  
381 areas of cold air drainage. Competitive advantages caused by the warming or outbreaks of spruce  
382 beetles (*Dendroctonus rufipennis* Kirby) could have favored *Pinus* over *Picea* at Summit Lake  
383 (Berg, David Henry, Fastie, De Volder, & Matsuoka, 2006; Veblen, Hadley, Reid, & Rebertus,  
384 1991), which was similar to the replacement of *Picea* by *Pinus* at Gold Creek Lake during an  
385 earlier period of warmth or low snow cover ca. 2000 BP (Figs 4b and 5b; Anderson 2011;  
386 Anderson *et al.* 2015).

387         Peaks in *Quercus* pollen percentages at Seven and Gold Creek lakes at ca. 1000 BP may  
388 also represent a response to warming (Figs 4a and 5b). The long-distance dispersal of pollen  
389 from Gamble's oak populations on the west slope of the Park Range could indicate that the  
390 populations expanded upslope, especially into south facing microsites, as the landscape warmed.  
391 Increased effective moisture during the last millennium may have also been a factor in their  
392 expansion (Anderson 2011; Shuman *et al.*, 2009), while the opening of the forests around the  
393 high-elevation lakes over the last millennium may have also favored the deposition of remotely  
394 dispersed oak pollen.

395

396 *Post-fire conditions*

397           After the widespread wildfires, the four high elevation pollen records indicate a rapid  
398 decline in conifer abundance relative to shrub and herb pollen (Fig. 7c). The open forest types  
399 that developed include the then-novel assemblage that today encompasses the high-elevation  
400 ribbon forests observed near Summit Lake (Fig. 8). Fire probably favored the rapid formation of  
401 the first large areas of ribbon forests (Calder & Shuman, 2017), and subsequent cooling favored  
402 their spread as indicated by the appearance of the same cluster at Gem and Gold Creek lakes by  
403 ca. 500 BP (Fig. 8). Increases in *Artemisia* pollen percentages at sites like Hinman Lake (Fig.  
404 6b), however, illustrate that the forests also opened in other ways after the fires, such as through  
405 the creation of new low elevation meadows.

406           The recovery of *Pinus* pollen percentages after the sharp fire-related minimum at Gold  
407 Creek Lake (red bar, Fig. 5b) indicates that some successional recovery followed the fires. In  
408 fact, the response at Gold Creek Lake first includes a peak in the percentages of *Artemisia* and  
409 herbaceous taxa at ca. 1100 BP, then a brief maximum in *Pinus* pollen percentages, and finally  
410 an increase in *Picea* pollen percentages, which is not unlike the successional sequence in these  
411 forests today. The apparent successional recovery at Gold Creek Lake culminated, however, in a  
412 lower C:H ratio than observed before the wildfires (Fig. 5b). At Hidden Lake, the shift toward an  
413 open forest was not persistent and may also be consistent with its elevation, where neither high-  
414 elevation low temperatures nor winter temperature inversions in low-elevation areas would have  
415 been a factor (Fig. 6a). Also, the fires may have been less severe near Hidden Lake than in other  
416 areas.

417

418 *Why changes were detected*

419 Detecting paleoecological changes in response to wildfire is difficult. Contemporary  
420 examples show that wildfires can trigger abrupt vegetation changes, and many paleoecological  
421 studies have attempted to understand the effects of wildfire on century to millennia time scales  
422 across a variety of biomes (Clifford & Booth, 2015; Green, 1982; Nelson, Hu, Grimm, Curry, &  
423 Slate, 2006; Umbanhowar, 2004). However, in multiple subalpine ecosystem studies, no  
424 consistent patterns were observed between detected fires and the pollen records (Minckley &  
425 Long, 2016; Shriver & Minckley, 2012). One challenge associated with detecting the influence  
426 of fires on vegetation arises from differences in pollen and charcoal source areas.

427 Individual lake records, like individual fire scarred trees, only record fire within a point  
428 on the landscape. As a result, charcoal peaks cannot be used to determine whether a fire burned a  
429 small or large portion of the surrounding ecosystem (Gavin, Brubaker, & Lertzman, 2003). In  
430 fact, most wildfires that produce significant charcoal accumulation peaks do not burn across the  
431 entire pollen or charcoal source area (Gavin et al. 2003), leaving vegetation intact to continue  
432 contributing pollen to a sediment record and obfuscating any record of the vegetative responses  
433 to wildfire. Analyzing pollen at one spatial and temporal scale, and charcoal at another,  
434 inevitably creates patterns related to differing scales rather than the desired wildfire-climate-  
435 vegetation interactions (Wiens 1989).

436 Our composite record of the percentage of sites burned per century (Fig. 7b; Calder et al.,  
437 2015) may, however, resolve the problem by sampling wildfire at spatial scales closer to the  
438 scale of the full pollen source area. Without a composite fire record it would be hard to  
439 determine *a priori* which individual lake charcoal peaks would be expected to create a large  
440 change in the pollen records. Most local fires (plus symbols, Figs 4 – 6) did not produce any  
441 apparent changes in our pollen records. Localized fire events at Hidden Lake ca. 650 and ca.1450

442 BP may be notable exceptions because they were followed by changes in the pollen assemblages  
443 consistent with an opening of the surrounding landscape, but this type of response in these  
444 individual records is the exception rather than the rule. The coincidence of widespread evidence  
445 of fires (Fig. 7b) and sharp, widespread declines in tree abundances at ca. 1100 BP (Figs 4 – 6  
446 and 7c), however, are consistent with the expectation that the spread of exceptionally large fires  
447 could substantially influence the mix of pollen dispersed across the landscape. That the change  
448 persisted because of subsequent climatic limitations on forest recovery further increased the  
449 likelihood of detection.

450

#### 451 *Fire feedbacks*

452         The increase in non-arboreal pollen percentages at the high elevations lakes likely  
453 represents the development of ribbon forests, large meadows, and potentially new areas of tundra  
454 across the landscape (Fig. 7c). The opening of the high elevation forests could have created fuel  
455 breaks across the mountain range, which would be consistent with our second hypothesis that  
456 vegetation changes could feedback to alter fire regimes. Such limits on the spread of wildfire  
457 may explain why the area burned per century declined after ca. 1100 BP even while warmth  
458 persisted in the region (Fig. 7a, b), especially if severe Medieval droughts delayed forest  
459 recovery (Calder et al., 2015; Cook et al., 2004; Woodhouse et al., 2010). Indeed, isolated high-  
460 elevation sites, like Seven Lakes, recorded almost no fires in the past millennium once the pollen  
461 records show an increase in non-arboreal pollen (Fig. 4a; Calder et al. 2014). The changes in  
462 wildfire and vegetation indicate that the relationships among components of the fire-regime  
463 triangle (Fig. 1) were sensitive to small (~0.5 °C) climate changes and the particular sequence of  
464 events.

465           The coincident decline in arboreal pollen percentages and in wildfire frequency when  
466 temperatures remained elevated (ca. 1000 BP in Fig. 7) indicates an important vegetation  
467 feedback in the fire-regime triangle (Fig. 1d). The change supports our first hypothesis that fires  
468 in conifer forests can facilitate critical transitions and the development of multiple states, defined  
469 by high and low forest cover that depends upon the fire history (Scheffer, Hirota, Holmgren, Van  
470 Nes, & Chapin, 2012). Open areas may then further limit the spread of fire. In boreal forests, past  
471 fire-vegetation feedbacks increased less flammable deciduous taxa and, thus, limited the area  
472 burned by subsequent fires even after regional temperatures increased (Girardin et al., 2013;  
473 Kelly et al., 2013; J. A. Lynch, Clark, Bigelow, Edwards, & Finney, 2002). Likewise, negative  
474 fire-vegetation feedbacks indicate that models based strictly on climate-fire relationships will  
475 over-predict the area burned in boreal forests (Heon, Arseneault, & Parisien, 2014). Future  
476 climate change will likely synchronize widespread fires across subalpine landscapes (Westerling,  
477 Turner, Smithwick, Romme, & Ryan, 2011), but the evidence here indicates that climate-fire-  
478 vegetation feedbacks could alter forest density or composition at high elevations, and limit or  
479 modify the long-term wildfire responses (Fig. 7).

480

481

## 482 **Conclusions**

483           Climate change influences both vegetation and wildfire (Fig. 1), and the history of the  
484 Mount Zirkel Wilderness indicates that small temperature increases ( $\sim 0.5$  °C) can result in  
485 widespread wildfires and large vegetation changes. Wildfire regimes responded nonlinearly to  
486 temperature as the percentage of sites burned declined while temperatures were still elevated  
487 (Calder et al., 2015). The nonlinearity most likely arose because vegetation also responded

488 nonlinearly through interacting effects of wildfire and climate change. Fires killed trees across  
489 the landscape, and the sharp shift in vegetation patterns and composition altered fuel structures  
490 and continuity. The vegetation change, thus, prevented additional large fires from burning, and  
491 as a result, the ecosystem, including both its vegetation and disturbance regimes, shifted  
492 abruptly. Novel patterns and forest types emerged, especially as climate continued to change and  
493 shape the legacies of the fires (Fig. 8). These changes underscore the potential for forests to  
494 undergo critical transitions as ongoing climate changes alter the relationships among climate,  
495 vegetation, and wildfire.

496

497 **Author Contributions:** W.J.C. and I.V. generated the data and W.J.C. and B.S. developed the  
498 study design, extracted the sediment cores, analyzed the data, and wrote the manuscript. All  
499 authors contributed to the drafts and gave final approve for publication.

500

501 **Acknowledgements:** We thank Jeremiah Marsicek, Grace Carter, Dusty Parker, Cody Stopka,  
502 Keith Ingledew, Devin Hougardy, Corianne Calder, Rhowe Stefanski, Ethan Harris, Ashley  
503 Harris, Marc Serravezza, Aaron Condie, Danny Vecchio, and David Webster for help coring and  
504 with lab work. The National Science Foundation Grant BCS-0845129 (to B.N.S.) supported this  
505 project.

506

507 **Data Accessibility:** Charcoal data for the wildfire reconstructions (Calder et al., 2015) are  
508 available through the International Multiproxy Paleofire Database ([www.ncdc.noaa.gov/data-  
509 access/paleoclimatology-data/datasets/fire-history](http://www.ncdc.noaa.gov/data-access/paleoclimatology-data/datasets/fire-history)). The pollen data will be made available upon  
510 publication in the Neotoma Paleoecology Database ([www.neotomadb.org/](http://www.neotomadb.org/)).

511 **References**

- 512
- 513 Allen, C. D., Macalady, A. K., Chenchouni, H., Bachelet, D., McDowell, N., Vennetier, M., ...
- 514 Cobb, N. (2010). A global overview of drought and heat-induced tree mortality reveals
- 515 emerging climate change risks for forests. *Forest Ecology and Management*, 259(4), 660–
- 516 684. doi:10.1016/j.foreco.2009.09.001
- 517 Anderson, L. (2011). Holocene record of precipitation seasonality from lake calcite <sup>18</sup>O in the
- 518 central Rocky Mountains, United States. *Geology*, 39(3), 211–214. doi:10.1130/G31575.1
- 519 Anderson, L., Berkelhammer, M., & Mast, M. A. (2015). Isotopes in North American Rocky
- 520 Mountain Snowpack 1993–2014. *Quaternary Science Reviews*, 131, 1–12.
- 521 doi:10.1016/j.quascirev.2015.03.023
- 522 Atwood, W. (1937). Records of Pleistocene glaciers in the Medicine Bow and Park Ranges. *The*
- 523 *Journal of Geology*, 45, 113–140.
- 524 Berg, E. E., David Henry, J., Fastie, C. L., De Volder, A. D., & Matsuoka, S. M. (2006). Spruce
- 525 beetle outbreaks on the Kenai Peninsula, Alaska, and Kluane National Park and Reserve,
- 526 Yukon Territory: relationship to summer temperatures and regional differences in
- 527 disturbance regimes. *Forest Ecology and Management*, 227(3), 219–232.
- 528 doi:10.1016/j.foreco.2006.02.038
- 529 Billings, W. (1969). Vegetational pattern near alpine timberline as affected by fire-snowdrift
- 530 interactions. *Vegetatio*, 19, 192–207.
- 531 Calder, W. J., Parker, D., Stopka, C. J., Jiménez-Moreno, G., & Shuman, B. N. (2015). Medieval
- 532 warming initiated exceptionally large wildfire outbreaks in the Rocky Mountains.
- 533 *Proceedings of the National Academy of Sciences USA*, 112(43), 13261–13266.



- 534       doi:10.1073/pnas.1500796112
- 535   Calder, W. J., & Shuman, B. N. (2017). Extensive wildfires, climate change, and an abrupt state  
536       change in subalpine ribbon forests, Colorado. *Ecology*, 98(10), 2585–2600.  
537       doi:10.1002/ecy.1959
- 538   Calder, W. J., Stopka, C. J., & Shuman, B. N. (2014). High-elevation fire regimes in subalpine  
539       ribbon forests during the Little Ice Age and Medieval Period along the Continental Divide,  
540       Colorado, U.S.A. *Rocky Mountain Geology*, 49(1), 75–90. doi:10.2113/gsrocky.49.1.75
- 541   Clifford, M. J., & Booth, R. K. (2015). Late-Holocene drought and fire drove a widespread  
542       change in forest community composition in eastern North America. *The Holocene*, 25(7),  
543       1102–1110. doi:10.1177/0959683615580182
- 544   Cook, E. R., Woodhouse, C. A., Eakin, C. M., Meko, D. M., & Stahle, D. W. (2004). Long-term  
545       aridity changes in the western United States. *Science (New York, N.Y.)*, 306(5698), 1015–8.  
546       doi:10.1126/science.1102586
- 547   Coop, J. D., & Givnish, T. J. (2008). Constraints on tree seedling establishment in montane  
548       grasslands of the Vales Caldera, New Mexico. *Ecology*, 89(4), 1101–1111. doi:10.1890/06-  
549       1333.1
- 550   Erdman, C., & Emerson, J. W. (2007). bcp<sup>2</sup>: An R Package for Performing a Bayesian Analysis  
551       of Change Point Problems. *Journal Of Statistical Software*, 23(3), 1–13.  
552       doi:10.1002/wics.10
- 553   Faegri, K., Kaland, P. E., & Kzywinski, K. (1989). *Textbook of pollen analysis*. New York, New  
554       York: Wiley.
- 555   Gavin, D. G., Brubaker, L. B., & Lertzman, K. P. (2003). An 1800-year record of the spatial and  
556       temporal distribution of fire from the west coast of Vancouver Island , Canada, 586, 573–

- 557           586. doi:10.1139/X02-196
- 558   Girardin, M. P., Ali, A. a, Carcaillet, C., Blarquez, O., Hély, C., Terrier, A., ... Bergeron, Y.  
559           (2013). Vegetation limits the impact of a warm climate on boreal wildfires. *The New*  
560           *Phytologist*, 199(4), 1001–11. doi:10.1111/nph.12322
- 561   Green, D. (1982). Fire and stability in the postglacial forests of southwest Nova Scotia. *Journal*  
562           *of Biogeography*, 9(1), 29–40.
- 563   Grimm, E. C. (1987). CONISS: a FORTRAN 77 program for stratigraphically constrained  
564           cluster analysis by the method of incremental sum of squares. *Computers and Geosciences*,  
565           13(1), 13–35. doi:10.1016/0098-3004(87)90022-7
- 566   Harvey, B. J., Donato, D. C., & Turner, M. G. (2016). High and dry: Postfire drought and large  
567           stand-replacing burn patches reduce postfire tree regeneration in subalpine forests. *Global*  
568           *Ecology and Biogeography*, 25(6), 655–669. doi:10.1111/geb.12443
- 569   Haslett, J., & Parnell, A. (2008). A simple monotone process with application to radiocarbon-  
570           dated depth chronologies. *Journal of the Royal Statistical Society: Series C*, 57(4), 399–418.  
571           doi:10.1111/j.1467-9876.2008.00623.x
- 572   Heon, J., Arseneault, D., & Parisien, M. (2014). Resistance of the boreal forest to high burn  
573           rates. *Proceedings of the National Academy of Sciences USA*, 111(38), 13888–13893.  
574           doi:10.1073/pnas.1409316111
- 575   Hiemstra, C., Liston, G., & Reiners, W. (2002). Snow redistribution by wind and interactions  
576           with vegetation at upper treeline in the Medicine Bow Mountains, Wyoming, USA. *Arctic*,  
577           *Antarctic, and Alpine Research*, 34(3), 262–273. doi:10.2307/1552483
- 578   Higuera, P. E., Brubaker, L. B., Anderson, P. M., Hu, F. S., & Brown, T. A. (2009). Vegetation  
579           mediated the impacts of postglacial climate change on fire regimes in the south-central

- 580 Brooks Range, Alaska. *Ecological Monographs*, 79(2), 201–219. doi:10.1890/07-2019.1
- 581 Jackson, S. T., Betancourt, J. L., Booth, R. K., & Gray, S. T. (2009). Ecology and the ratchet of  
582 events: climate variability, niche dimensions, and species distributions. *Proceedings of the*  
583 *National Academy of Sciences USA*, 106, 19685–19692. doi:10.1073/pnas.0901644106
- 584 Juggins, S. (2015). rioja: Analysis of Quaternary Science Data. R package version 0.9-5.
- 585 Kelly, R., Chipman, M. L., Higuera, P. E., Stefanova, I., Brubaker, L. B., & Hu, F. S. (2013).  
586 Recent burning of boreal forests exceeds fire regime limits of the past 10,000 years.  
587 *Proceedings of the National Academy of Sciences of the USA*, 110(32), 13055–13060.  
588 doi:10.1073/pnas.1305069110
- 589 Lynch, E. A. (1996). The ability of pollen from small lakes and ponds to sense fine-scale  
590 vegetation patterns in the central Rocky Mountains, United States. *Review of Palaeobotany*  
591 *and Palynology*, 94(3–4), 197–210. doi:10.1016/S0034-6667(96)00040-1
- 592 Lynch, J. A., Clark, J. S., Bigelow, N. H., Edwards, M. E., & Finney, B. P. (2002). Geographic  
593 and temporal variations in fire history in boreal ecosystems of Alaska. *Journal of*  
594 *Geophysical Research*, 108(1), 1–17. doi:10.1029/2001JD000332
- 595 Mann, M. E., Zhang, Z., Rutherford, S., Bradley, R. S., Hughes, M. K., Shindell, D., ... Ni, F.  
596 (2009). Global signatures and dynamical origins of the Little Ice Age and Medieval Climate  
597 Anomaly. *Science*, 326(5957), 1256–1260. doi:10.1126/science.1177303
- 598 Millar, C. I., & Stephenson, N. L. (2015). Temperate forest health in an era of emerging  
599 megadisturbance. *Science*, 349(6250), 823–826. doi:10.1126/science.aaa9933
- 600 Minckley, T. A., & Long, C. J. (2016). Paleofire severity and vegetation change in the Cascade  
601 Range, Oregon, USA. *Quaternary Research*, 85(2), 211–217.  
602 doi:10.1016/j.yqres.2015.12.010

- 603 Moir, W. H., Rochelle, S. G., & Schoettle, A. W. (1999). Microscale Patterns of Tree  
604 Establishment near Upper Treeline, Snowy Range, Wyoming, U.S.A. *Arctic, Antarctic, and*  
605 *Alpine Research*, 31(4), 379–388. doi:10.2307/1552586
- 606 Nelson, D., Hu, F., Grimm, E., Curry, B., & Slate, J. (2006). The influence of aridity and fire on  
607 Holocene prairie communities in the eastern Prairie Peninsula. *Ecology*, 87(10), 2523–2536.  
608 Retrieved from [http://www.esajournals.org/doi/abs/10.1890/0012-](http://www.esajournals.org/doi/abs/10.1890/0012-9658(2006)87[2523:TIOAAF]2.0.CO;2)  
609 [9658\(2006\)87\[2523:TIOAAF\]2.0.CO;2](http://www.esajournals.org/doi/abs/10.1890/0012-9658(2006)87[2523:TIOAAF]2.0.CO;2)
- 610 Parnell, A. C., Haslett, J., Allen, J. R. M., Buck, C. E., & Huntley, B. (2008). A flexible  
611 approach to assessing synchronicity of past events using Bayesian reconstructions of  
612 sedimentation history. *Quaternary Science Reviews*, 27, 1872–1885.  
613 doi:10.1016/j.quascirev.2008.07.009
- 614 Peet, R. K. (1981). Forest vegetation of the Colorado Front Range: Composition and dynamics.  
615 *Vegetatio*, 45(1), 3–75.
- 616 R Development Core Team. (2014). R: A Language Environment for Statistical Computing.  
617 Vienna, Austria: R Foundation for Statistical Computing.
- 618 Scheffer, M., Carpenter, S., Lenton, T., Bascompte, J., Brock, W., Dakos, V., ... Vandermeer, J.  
619 (2012). Anticipating critical transitions. *Science*, 388(6105), 344–348.  
620 doi:10.1126/science.1225244
- 621 Scheffer, M., Hirota, M., Holmgren, M., Van Nes, E. H., & Chapin, F. S. (2012). Thresholds for  
622 boreal biome transitions. *Proceedings of the National Academy of Sciences USA*, 109(52),  
623 21384–9. doi:10.1073/pnas.1219844110
- 624 Schwartz, M. W. (1989). Predicting tree frequencies from pollen frequency: an attempt to  
625 validate the R value method. *New Phytologist*, 112(1), 129–143. doi:10.1111/j.1469-

- 626 8137.1989.tb00318.x
- 627 Shriver, R., & Minckley, T. (2012). Late-Holocene response of limber pine (*Pinus flexilis*)  
628 forests to fire disturbance in the Pine Forest Range, Nevada, USA. *Quaternary Research*,  
629 78(3), 465–473. doi:10.1016/j.yqres.2012.07.010
- 630 Simpson, G. L. (2007). Analogue Methods in Palaeoecology□: Using the analogue Package.  
631 *Journal Of Statistical Software*, 22(2), 1–29.
- 632 Snyder, G. L. (1980a). Geologic map of the central part of the northern Park Range, Jackson and  
633 Routt counties, Colorado. *U.S. Geol. Surv. Misc. Invest. Ser. Map*, 1–1112.
- 634 Snyder, G. L. (1980b). Geologic map of the northernmost Park Range and southernmost Sierra  
635 Madre, Jackson and Routt Counties, Colorado. *U.S. Geol. Surv. Misc. Invest. Ser. Map*, 1–  
636 1113.
- 637 Trouet, V., Diaz, H. F., Wahl, E. R., Viau, A. E., Graham, R., Graham, N., & Cook, E. R. (2013).  
638 A 1500-year reconstruction of annual mean temperature for temperate North America on  
639 decadal-to-multidecadal time scales. *Environmental Research Letters*, 8(24008), 1–10.  
640 doi:10.1088/1748-9326/8/2/024008
- 641 Turner, M. G. (2010). Disturbance and landscape dynamics in a changing world. *Ecology*, 9(10),  
642 2833–2849. Retrieved from <http://www.esajournals.org/doi/abs/10.1890/10-0097.1>
- 643 Turner, M. G., Gardner, R. H., & O'Neill, R. V. (2015). *Landscape Ecology: in theory and*  
644 *practice*. (J. Slobodien, Ed.) (Second edi). New York: Springer-Verlag.
- 645 Umbanhowar, C. E. (2004). Interaction of fire, climate and vegetation change at a large  
646 landscape scale in the Big Woods of Minnesota, USA. *The Holocene*, 14(5), 661–676.  
647 doi:10.1191/0959683604hl745rp
- 648 Veblen, T., Hadley, K., Reid, M., & Rebertus, A. (1991). The response of subalpine forests to

649 spruce beetle outbreak in Colorado. *Ecology*, 72(1), 213–231. Retrieved from  
650 <http://www.jstor.org/stable/10.2307/1938916>

651 Westerling, A. L., Turner, M. G., Smithwick, E. A. H., Romme, W. H., & Ryan, M. G. (2011).  
652 Continued warming could transform Greater Yellowstone fire regimes by mid-21st century.  
653 *Proceedings of the National Academy of Sciences USA*, 108(32), 13165–13170.  
654 doi:10.1073/pnas.1110199108

655 Whitlock, C., Higuera, P. E., Mcwethy, D. B., & Briles, C. E. (2010). Paleoecological  
656 perspectives on fire ecology: revisiting the fire-regime concept. *The Open Ecology Journal*,  
657 3, 6–23. doi:10.2174/1874213001003020006

658 Woodhouse, C. A., Meko, D. M., MacDonald, G. M., Stahle, D. W., & Cook, E. R. (2010). A  
659 1,200-year perspective of 21st century drought in southwestern North America.  
660 *Proceedings of the National Academy of Sciences of the USA*, 107(50), 21283–8.  
661 doi:10.1073/pnas.0911197107  
662

663

**Table 1. Lake site information**

| Lake        | Elevation |          | Longitude | Coring date | Water | Lake | Surrounding forest type                       |
|-------------|-----------|----------|-----------|-------------|-------|------|-----------------------------------------------|
|             | (m)       | Latitude |           |             | depth | Size |                                               |
|             | (m)       |          |           |             | (m)   | (ha) |                                               |
| Seven Lake  | 3276      | 40.896   | -106.681  | 8/16/2011   | 5.75  | 3.2  | ribbon forests                                |
| Summit Lake | 3149      | 40.545   | -106.682  | 8/19/2010   | 5.85  | 1.9  | ribbon forests                                |
| Gem Lake    | 3101      | 40.881   | -106.734  | 8/9/2012    | 6.5   | 2.8  | spruce-fir                                    |
| Gold Creek  | 2917      | 40.781   | -106.678  | 7/9/2012    | 10.6  | 3.7  | spruce-fir                                    |
| Hidden Lake | 2704      | 40.504   | -106.607  | 6/24/2005   | 6.6   | 3.8  | mixed<br>lodgepole,<br>spruce-fir, &<br>aspen |
| Hinman Lake | 2501      | 40.771   | -106.827  | 6/21/2012   | >5    | 2.7  | mixed<br>lodgepole,<br>spruce-fir, &<br>aspen |

664

665

666 **Figures**

667

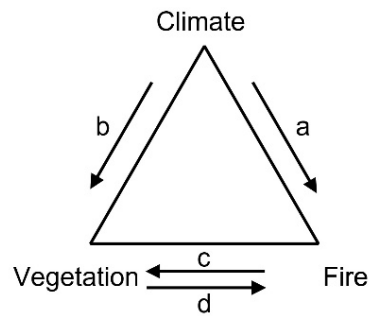

668

669

670 **Fig. 1.** Fire regime triangle indicating the relationship between climate change, wildfire, and  
671 vegetation. Climate influences both vegetation and wildfire, and vegetation and wildfire can  
672 interact to influence each other.

673

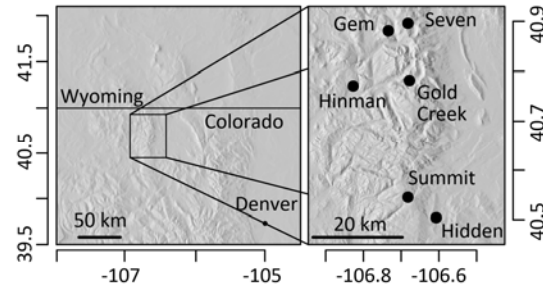

674

675 **Fig. 2.** Coring locations for the lake sites in and around the Mount Zirkel Wilderness Area in  
676 northern Colorado.

677



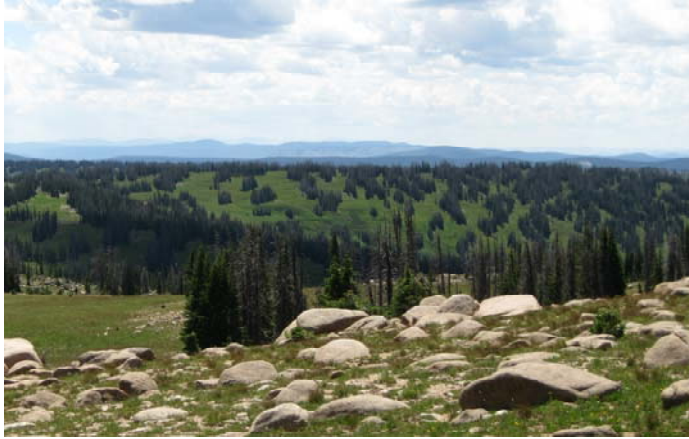

678

679

680 **Fig. 3.** Ribbon forests within our study area.

681

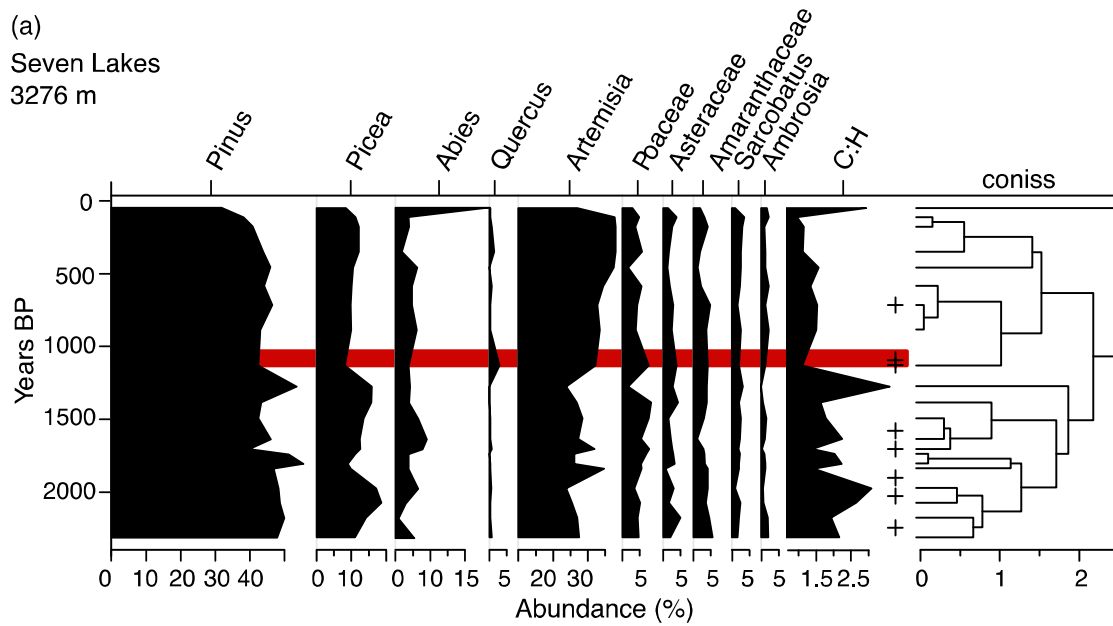

682

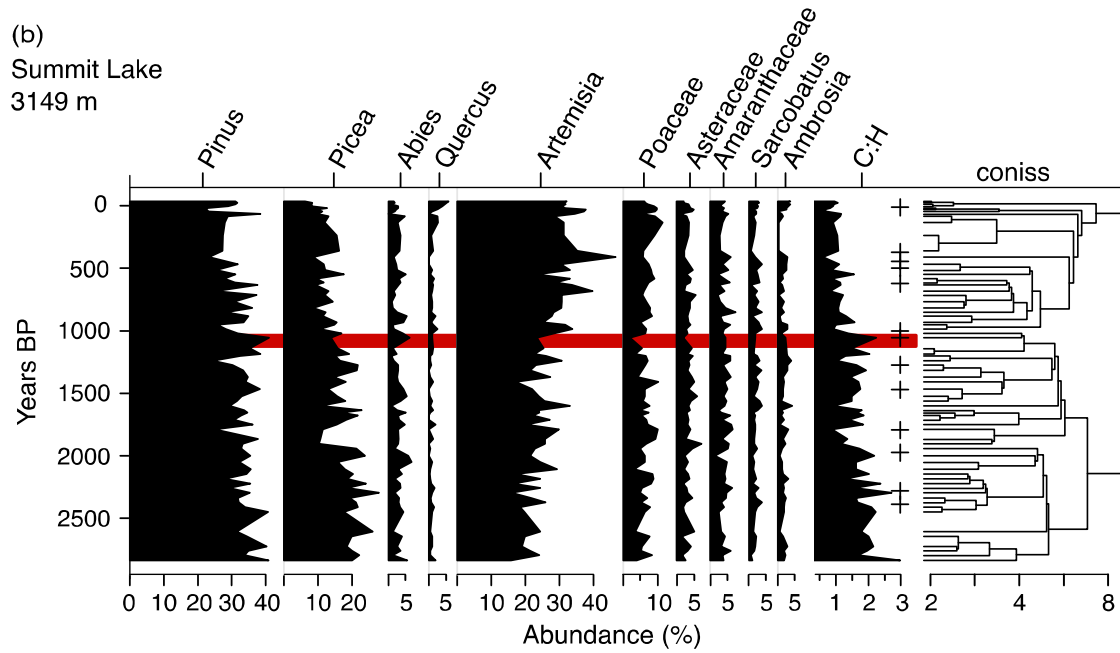

683

684

685 **Fig. 4.** Terrestrial pollen percentages from the highest elevation sites. Plus symbols represent fire  
686 events detected within the individual cores and red bars highlight the century of peak landscape  
687 scale wildfires shown in Figure 7.

688

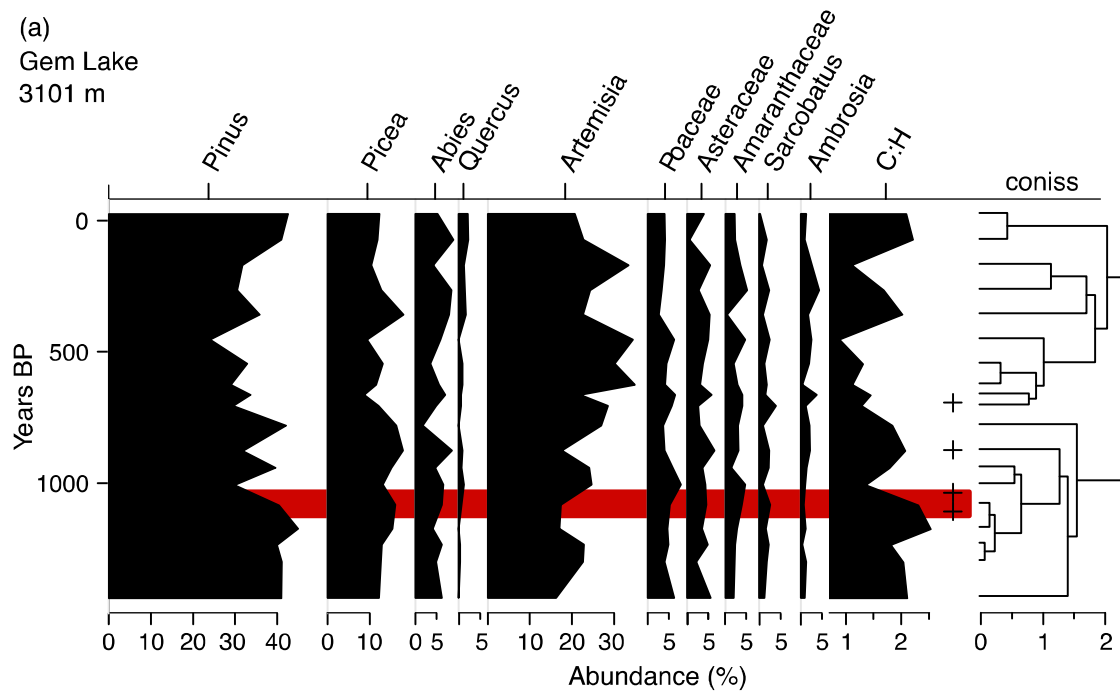

689

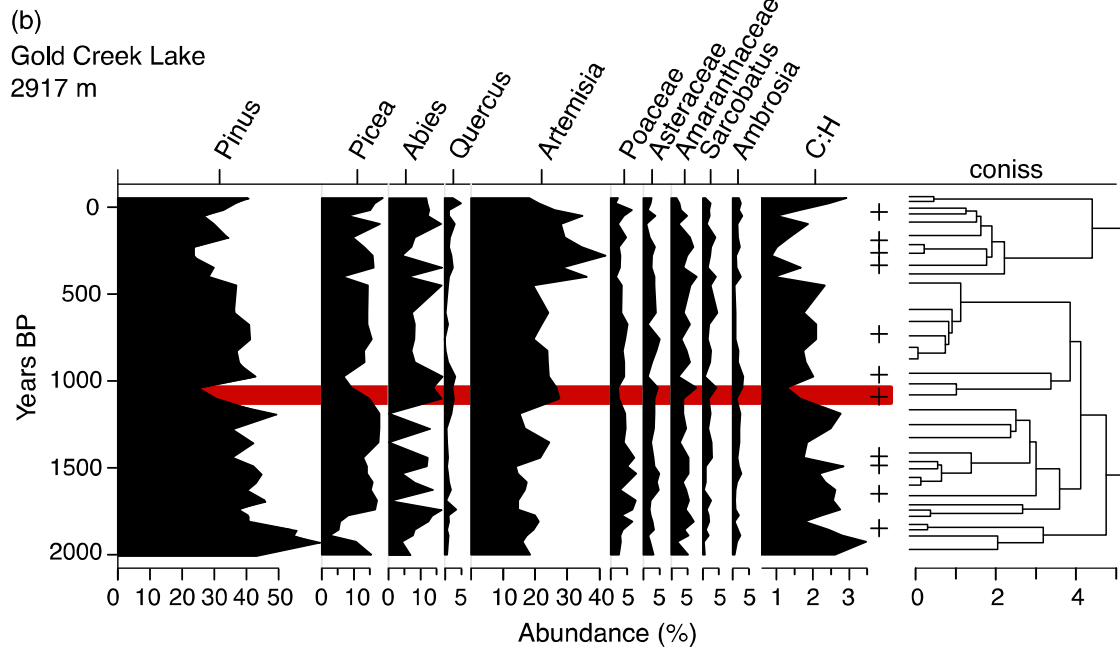

690

691 **Fig. 5.** Terrestrial pollen percentages from the mid elevation sites. Plus symbols represent fire  
692 events detected within the individual cores and red bars highlight the century of peak landscape  
693 scale wildfires shown in Figure 7.

694

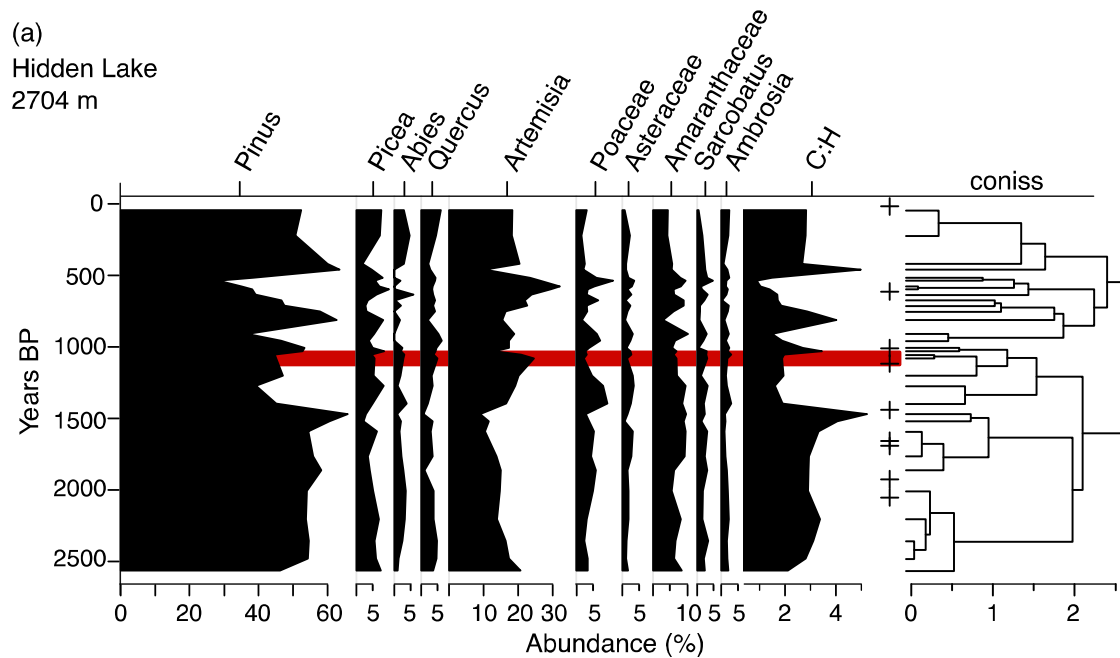

695

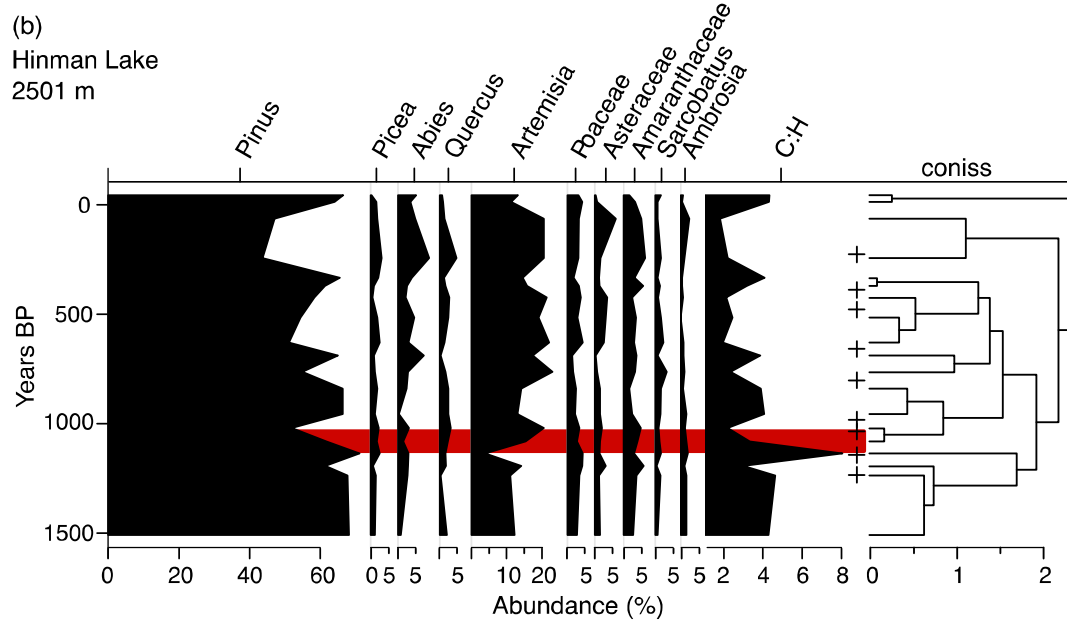

696

697 **Fig. 6.** Terrestrial pollen percentages from the lowest elevation sites: Hidden Lake (A) and

698 Hinman Lake (B). Plus symbols represent fire events detected within the individual cores and red

699 bars highlight the century of peak landscape scale wildfires shown in Figure 7.

700

701

702

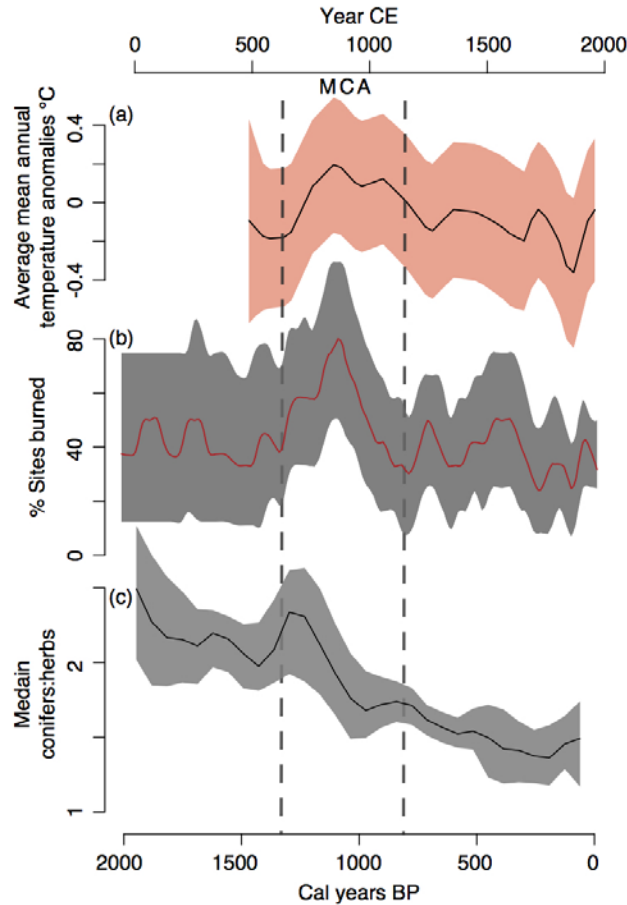

703

704 **Fig. 7.** Vegetation change across the landscape after a rise in mean annual temperature in North  
705 America (a; from Trouet et al. 2013) and percent sites burned (b; from Calder et al. 2015) with  
706 median C:H ratios (c) from the four highest elevation sites (Summit Lake, Seven Lakes, Gem  
707 Lake, and Gold Creek Lake). Orange bands in (a) represent two standard errors around the mean  
708 (black), and grey bands in (b) and (c) represent 90% confidence bands around median percent  
709 sites burned and pollen ratio.

710

711

712

713

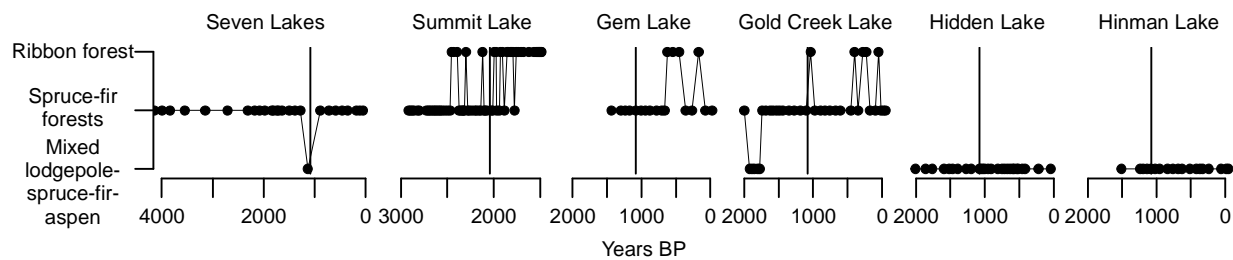

714

715 **Fig. 8.** Unconstrained cluster analysis of the first three clusters from all sites separated by site

716 through time. The vertical line indicates the time of peak landscape wildfires centered at 1130

717 BP.

718
